# Supplementary material for: Recovery and reuse of heteropolyacid catalyst in liquid reaction medium through reversible encapsulation in Cu3(BTC)2 metal–organic framework
Source: Royal Society of Chemistry journal article supplement (doi:10.1039/c2sc01102f), 2012-01-01
Supplement: c2sc01102f.pdf [file c2sc01102f.pdf]

## Supporting information

# Recovery and Reuse of Heteropolyacid Catalyst in Liquid Reaction Medium through Reversible Encapsulation in $\text{Cu}_3(\text{BTC})_2$ Metal-Organic Framework

Nikki Janssens, Lik H. Wee, Sneha Bajpe, Eric Breynaert, Christine E.A. Kirschhock and Johan A. Martens

Center for Surface Chemistry and Catalysis, K. U. Leuven, Kasteelpark Arenberg 23, B-3001 Heverlee, Belgium

Email: johan.martens@biw.kuleuven.be

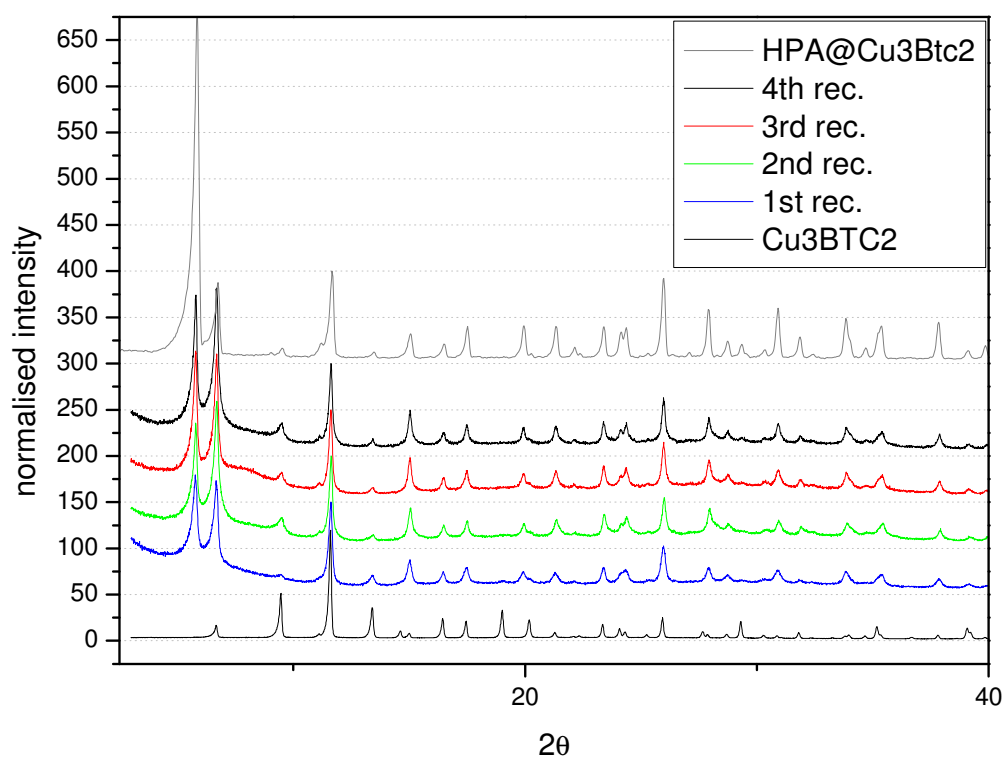

**Figure S1.** XRD patterns of the  $\text{HPW@Cu}_3(\text{BTC})_2$  recovered in 4 consecutive reactions, reference  $\text{Cu}_3(\text{BTC})_2$  HKUST-1<sup>[1]</sup> (bottom) and reference  $\text{HPW@Cu}_3(\text{BTC})_2$ <sup>[2]</sup> (top). Powder X-ray diffraction (XRD) using  $\text{Cu K}\alpha_1$  radiation was performed on a STOE StadiP diffractometer in transmission mode.

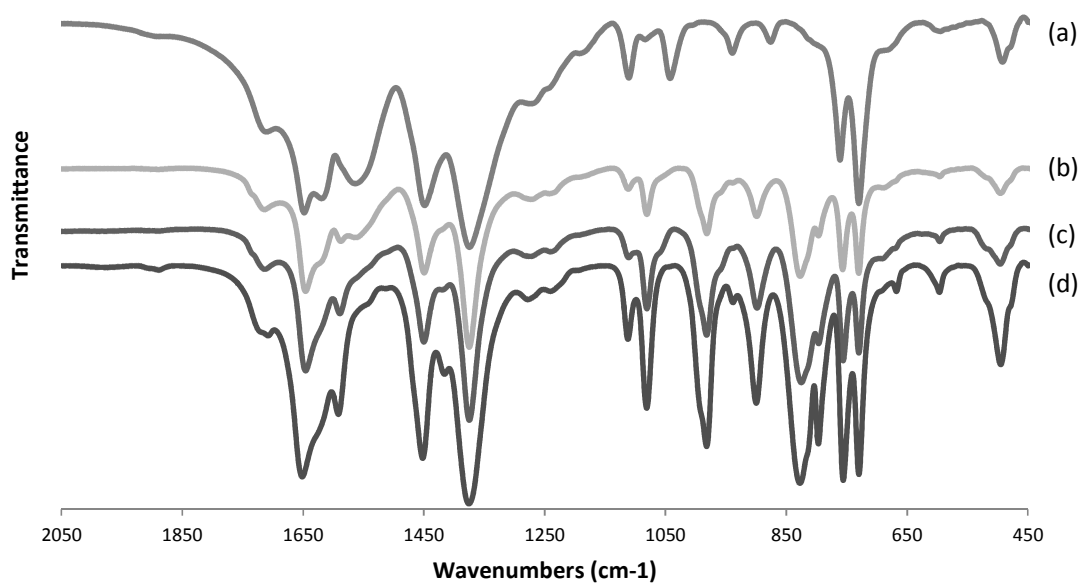

**Figure S2.** ATR-IR spectra of (a)  $\text{Cu}_3(\text{BTC})_2$  synthesized<sup>[1]</sup>; (b)  $\text{HPW}@\text{Cu}_3(\text{BTC})_2$  first time precipitated in reaction product; (c)  $\text{HPW}@\text{Cu}_3(\text{BTC})_2$  recovered from reaction products after 4 times reuse; (d)  $\text{HPW}@\text{Cu}_3(\text{BTC})_2$  reference material.<sup>[2]</sup> ATR-IR (Attenuated Total Reflection-Infrared) spectra were recorded using Bruker Vertex 70 V spectrometer equipped with a diamond golden gate ATR cell.

[1] S. S. Y. Chui, S. M. F. Lo, J. P. H. Charmant, A. G. Orpen, I. D. Williams, *Science* **1999**, 283, 1148.

[2] S. R. Bajpe, C. E. A. Kirschhock, A. Aerts, E. Breynaert, G. Absillis, T. N. Parac-Vogt, L. Giebeler, J. A. Martens, *Chem.-Eur. J.* **2010**, 16, 3926.
